# Supplementary material
Source: publisher figshare collection journal article supplement (https://frontiersin.figshare.com/ndownloader/files/34909743)
Supplement: Supplementary file [file 34909743]

**Table S1.** Skeletal phenotypes associated with *Hoxa5* loss-of-function are reproduced following conditional deletion in LPM or somites at E18.5. Wild-type phenotypes are listed in bold font and *Hoxa5*-associated phenotypes in regular font. Abbreviations: TA, tuberculum anterior; T1, first thoracic rib; T2, second thoracic rib.

|                     |                                                                           | LPM Δ                                 |      |                                                                 |      | Somite Δ                              |      |                                                               |     | Null                        |      |                             |      |
|---------------------|---------------------------------------------------------------------------|---------------------------------------|------|-----------------------------------------------------------------|------|---------------------------------------|------|---------------------------------------------------------------|-----|-----------------------------|------|-----------------------------|------|
|                     |                                                                           | <i>Hoxa5</i> <sup>fl/+ or fl/fl</sup> |      | <i>Tg</i> <sup>Prx1-Cre;</sup><br><i>Hoxa5</i> <sup>fl/fl</sup> |      | <i>Hoxa5</i> <sup>fl/+ or fl/fl</sup> |      | <i>Meox1</i> <sup>Cre;</sup><br><i>Hoxa5</i> <sup>fl/fl</sup> |     | <i>Hoxa5</i> <sup>+/+</sup> |      | <i>Hoxa5</i> <sup>-/-</sup> |      |
| Structure           | Phenotype                                                                 | #                                     | %    | #                                                               | %    | #                                     | %    | #                                                             | %   | #                           | %    | #                           | %    |
| <b>C6</b>           | <b>TA present</b>                                                         | 29                                    | 85%  | 22                                                              | 81%  | 19                                    | 86%  | 19                                                            | 37% | 25                          | 83%  | 4                           | 15%  |
|                     | TA absent                                                                 | 5                                     | 15%  | 5                                                               | 19%  | 3                                     | 14%  | 33                                                            | 63% | 5                           | 17%  | 22                          | 85%  |
| <b>C7</b>           | <b>Rib absent</b>                                                         | 33                                    | 97%  | 27                                                              | 96%  | 22                                    | 100% | 38                                                            | 73% | 30                          | 100% | 19                          | 73%  |
|                     | Rib present (all)                                                         | 1                                     | 3%   | 1                                                               | 4%   | 0                                     | 0%   | 14                                                            | 27% | 0                           | 0%   | 7                           | 27%  |
|                     | Rib fused to T1                                                           | 0                                     | 0%   | 0                                                               | 0%   | 0                                     | 0%   | 6                                                             | 12% | 0                           | 0%   | 0                           | 0%   |
|                     | Rib fused to sternum                                                      | 0                                     | 0%   | 0                                                               | 0%   | 0                                     | 0%   | 1                                                             | 2%  | 0                           | 0%   | 0                           | 0%   |
| <b>T1</b>           | <b>Dorsal process absent</b>                                              | 15                                    | 94%  | 14                                                              | 100% | 9                                     | 90%  | 9                                                             | 41% | 12                          | 86%  | 2                           | 17%  |
|                     | Dorsal process present                                                    | 1                                     | 6%   | 0                                                               | 0%   | 1                                     | 10%  | 13                                                            | 59% | 2                           | 14%  | 10                          | 83%  |
| <b>Pre-sternum</b>  | <b>T1 ribs fused symmetrically and anterior to manubrium ossification</b> | 17                                    | 100% | 10                                                              | 71%  | 11                                    | 100% | 19                                                            | 73% | 14                          | 93%  | 9                           | 69%  |
|                     | Asymmetric T1 rib fusion                                                  | 0                                     | 0%   | 0                                                               | 0%   | 0                                     | 0%   | 7                                                             | 27% | 1                           | 7%   | 4                           | 31%  |
|                     | Extra sternum ossification anterior to T1                                 | 0                                     | 0%   | 4                                                               | 29%  | 0                                     | 0%   | 0                                                             | 0%  | 0                           | 0%   | 0                           | 0%   |
|                     | Ossification flanking T1 attachment                                       | 0                                     | 0%   | 0                                                               | 0%   | 0                                     | 0%   | 3                                                             | 3%  | 3                           | 10%  | 12                          | 46%  |
| <b>Meso-sternum</b> | <b>Symmetrical sternebrae</b>                                             | 17                                    | 100% | 12                                                              | 86%  | 10                                    | 90%  | 20                                                            | 77% | 14                          | 93%  | 13                          | 100% |
|                     | Crankshaft sternum                                                        | 0                                     | 0%   | 2                                                               | 14%  | 1                                     | 10%  | 6                                                             | 23% | 1                           | 7%   | 0                           | 0%   |
|                     | Number of Animals (n)*                                                    | 17                                    |      | 14                                                              |      | 11                                    |      | 26                                                            |     | 15                          |      | 13                          |      |
